# Supplementary material
Source: PubMed Central journal article supplement (PMC5341790)
Supplement: NIHMS851299-supplement-Appendix.pdf [file NIHMS851299-supplement-Appendix.pdf]

**SUPPLEMENTAL MATERIAL**

**Supplemental Table 1. Candidate Variables for the Prediction Models**

| <b>Category</b>                         | <b>Variables Considered for Prediction Model</b>                                                                                                                            |                                                                                                        |
|-----------------------------------------|-----------------------------------------------------------------------------------------------------------------------------------------------------------------------------|--------------------------------------------------------------------------------------------------------|
| <b>Demographics</b>                     | Age<br>Sex                                                                                                                                                                  | Race                                                                                                   |
| <b>Socioeconomic Status</b>             | 9-Item PHQ Depression Score $\geq 10^{23}$<br>Insurance for Medical Care                                                                                                    | 4-Item Perceived Stress Score $\geq 9^{24, 25}$<br>Avoided Care Due to Costs                           |
| <b>Lifestyle</b>                        | Activity Level During Leisure Time<br>Currently Working                                                                                                                     | Current Smoker                                                                                         |
| <b>Comorbidities</b>                    | Prior Myocardial Infarction<br>Prior Percutaneous Coronary Intervention<br>Prior Bypass Graft Surgery<br>Prior Stroke or Transient Ischemic Attack<br>Chronic Heart Failure | Peripheral Artery Disease<br>Chronic Lung Disease<br>History of Atrial Fibrillation<br>Body Mass Index |
| <b>Baseline Health Status</b>           | SAQ Angina Frequency Score                                                                                                                                                  | SAQ Quality of Life Score                                                                              |
| <b>Diabetes Control</b>                 | Taking Insulin Prior to Admission<br>Admission Glucose                                                                                                                      | Hemoglobin A1c                                                                                         |
| <b>Acute Presentation and Treatment</b> | ST-Elevations on Arrival<br>Admission Hemoglobin<br>In-Hospital Revascularization                                                                                           | Admission Creatinine<br>Peak Troponin<br>Left Ventricular Systolic Function                            |

Abbreviations: PHQ, Patient Health Questionnaire; SAQ, Seattle Angina Questionnaire

**Supplemental Table 2. Baseline Characteristics of Patients with vs. without 1-Year Angina Data**

|                                       | <b>Missing<br/>n=494</b> | <b>Not Missing<br/>n=976</b> | <b>P-Value</b> |
|---------------------------------------|--------------------------|------------------------------|----------------|
| Age (years)                           | 57.6 ± 11.7              | 60.7 ± 11.1                  | < 0.001        |
| Male                                  | 58.5%                    | 61.9%                        | 0.209          |
| White race                            | 48.7%                    | 62.8%                        | < 0.001        |
| Married                               | 44.8%                    | 51.8%                        | 0.011          |
| Lives alone                           | 26.1%                    | 25.0%                        | 0.647          |
| Insurance                             | 71.7%                    | 79.2%                        | 0.001          |
| High school education                 | 72.3%                    | 78.1%                        | 0.014          |
| Avoids care due to cost               | 31.6%                    | 26.5%                        | 0.041          |
| Currently working                     | 42.2%                    | 39.6%                        | 0.342          |
| Active during leisure time            | 18.5%                    | 20.6%                        | 0.339          |
| Current smoker                        | 38.2%                    | 30.3%                        | 0.002          |
| Body mass index (kg/m <sup>2</sup> )  | 31.4 ± 6.9               | 31.6 ± 7.1                   | 0.587          |
| Dyslipidemia                          | 56.9%                    | 59.0%                        | 0.433          |
| Hypertension                          | 83.2%                    | 78.1%                        | 0.020          |
| Prior myocardial infarction           | 24.3%                    | 24.8%                        | 0.832          |
| Prior coronary angioplasty            | 23.9%                    | 23.9%                        | 0.995          |
| Prior coronary bypass surgery         | 11.1%                    | 17.8%                        | < 0.001        |
| Peripheral vascular disease           | 5.1%                     | 6.9%                         | 0.177          |
| Prior stroke                          | 5.5%                     | 6.3%                         | 0.549          |
| Chronic heart failure                 | 14.2%                    | 11.7%                        | 0.173          |
| Atrial fibrillation/flutter           | 3.0%                     | 6.4%                         | 0.007          |
| Chronic lung disease                  | 7.1%                     | 8.0%                         | 0.537          |
| Depression                            | 22.6%                    | 20.8%                        | 0.449          |
| High emotional stress                 | 17.9%                    | 14.8%                        | 0.131          |
| ST-elevation myocardial infarction    | 33.4%                    | 36.1%                        | 0.312          |
| Peak troponin (ng/dL)                 | 22.5 ± 66.5              | 24.0 ± 81.7                  | 0.724          |
| Creatinine (mg/dL)                    | 1.4 ± 1.5                | 1.3 ± 1.0                    | 0.203          |
| Hemoglobin (mg/dL)                    | 13.7 ± 2.1               | 13.7 ± 2.1                   | 0.890          |
| Multivessel disease                   | 55.3%                    | 59.6%                        | 0.130          |
| Left ventricular systolic dysfunction | 23.5%                    | 19.1%                        | 0.051          |
| GRACE risk score                      | 101.6 ± 29.3             | 105.5 ± 28.4                 | 0.051          |
| Systolic blood pressure (mmHg)        | 147.1 ± 30.6             | 146.5 ± 30.7                 | 0.717          |
| Diastolic blood pressure (mmHg)       | 84.8 ± 19.5              | 83.2 ± 19.2                  | 0.116          |
| Taking insulin prior to admission     | 26.7%                    | 24.6%                        | 0.374          |
| Hemoglobin A1c (%)                    | 8.0 ± 2.0                | 8.0 ± 2.1                    | 0.851          |
| Fasting glucose (mg/dL)               | 170.4 ± 63.5             | 174.7 ± 80.1                 | 0.312          |
| Total cholesterol (mg/dL)             | 184.1 ± 58.6             | 173.9 ± 59.4                 | 0.002          |
| Triglycerides (mg/dL)                 | 193.8 ± 259.3            | 178.9 ± 241.9                | 0.294          |
| High density lipoprotein (mg/dL)      | 40.4 ± 12.8              | 40.0 ± 12.8                  | 0.548          |
| Low density lipoprotein (mg/dL)       | 108.4 ± 46.3             | 99.6 ± 42.6                  | < 0.001        |

|                                     |             |             |       |
|-------------------------------------|-------------|-------------|-------|
| SAQ Angina Frequency score          | 82.2 ± 23.8 | 84.5 ± 21.7 | 0.060 |
| SAQ Quality of Life score           | 60.1 ± 25.3 | 63.1 ± 23.6 | 0.025 |
| In-hospital coronary angioplasty    | 54.5%       | 60.6%       | 0.024 |
| In-hospital coronary bypass surgery | 9.5%        | 11.4%       | 0.277 |

---

GFR, glomerular filtration rate; GRACE, Global Registry of Acute Coronary Events; SAQ, Seattle Angina Questionnaire

**Supplemental Table 3. 5-Year Mortality Risk Score**

| <b>Characteristic</b>                 | <b>Points</b> |
|---------------------------------------|---------------|
| Age (years)                           |               |
| <50                                   | 0             |
| 50-59                                 | 4             |
| 60-69                                 | 9             |
| 70-79                                 | 13            |
| ≥80                                   | 17            |
| Not currently working                 | 12            |
| Not active during leisure time        | 11            |
| BMI (kg/m <sup>2</sup> )              |               |
| <25                                   | 8             |
| 25-<30                                | 6             |
| 30-<35                                | 4             |
| 35-<40                                | 3             |
| ≥40                                   | 0             |
| Prior MI                              | 6             |
| Chronic heart failure                 | 7             |
| Chronic lung disease                  | 10            |
| Admission creatinine (mg/dL)          |               |
| <0.8                                  | 0             |
| 0.8 to <1.0                           | 3             |
| 1.0 to <1.5                           | 5             |
| 1.5 to <2.0                           | 9             |
| ≥2.0                                  | 14            |
| Admission hemoglobin (mg/dL)          |               |
| <11                                   | 12            |
| 11 to <13                             | 9             |
| 13 to <15                             | 6             |
| 15 to <17                             | 3             |
| ≥17                                   | 0             |
| Left ventricular systolic dysfunction | 8             |
| Fasting glucose (mg/dL)               |               |
| <110                                  | 0             |
| 110 to <150                           | 1             |
| 150 to <190                           | 2             |
| 190 to <250                           | 4             |
| ≥250                                  | 6             |
| Currently on insulin                  | 6             |
| Not revascularized during AMI         | 6             |

Scores range from 0-123; scores 0-41 indicating low risk (predicted risk 3-12%), scores 42-59 indicating intermediate risk (predicted risk 12-30%), and scores 60-123 indicating high risk (predicted risk 30-90%)

**Supplemental Table 4. 1-Year Angina Risk Score**

| <b>Characteristic</b>      | <b>Points</b> |
|----------------------------|---------------|
| Age (years)                |               |
| <50                        | 4             |
| 50-59                      | 3             |
| 60-69                      | 2             |
| 70-79                      | 1             |
| ≥80                        | 0             |
| Female                     | 2             |
| Non-Caucasian race         | 2             |
| Not currently working      | 1             |
| Current smoker             | 1             |
| Prior CABG                 | 2             |
| Chronic heart failure      | 2             |
| SAQ Angina Frequency score |               |
| 0-30 (daily angina)        | 7             |
| >30-60 (weekly angina)     | 4             |
| >60-90 (monthly angina)    | 2             |
| 100 (no angina)            | 0             |

Scores range from 0-21; scores 0-5 indicating low risk (predicted risk 10-22%), scores 6-8 indicating intermediate risk (predicted risk 20-35%), and scores 9-21 indicating high risk (predicted risk 31-70%)
